# Supplementary material for: Aerosol-based ligand soaking of reservoir-free protein crystals
Source: PubMed Central journal article supplement (PMC8202026; doi:10.1107/s1600576721003551), 2021-05-28
Supplement: j-54-00895-sup5.pdf [file j-54-00895-sup5.pdf]

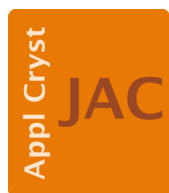

JOURNAL OF  
APPLIED  
CRYSTALLOGRAPHY

**Volume 54 (2021)**

**Supporting information for article:**

## **Aerosol-based Ligand Soaking of Reservoir-free Protein Crystals**

**Breyan Ross, Stephan Krapp, Ruth Geiss-Friedlander, Walter Littmann, Robert Huber and Reiner Kiefersauer**

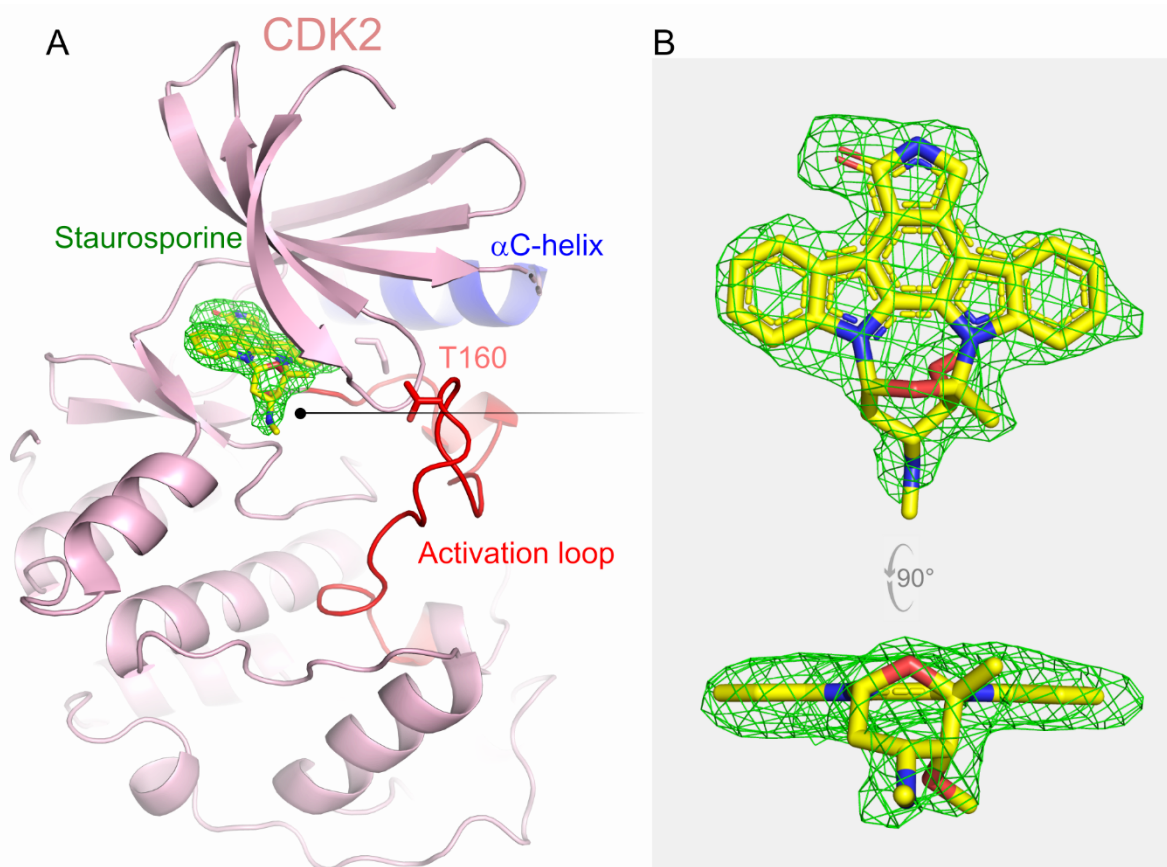

| Data collection           |                                               | Refinement                                |           |
|---------------------------|-----------------------------------------------|-------------------------------------------|-----------|
| Space group               | P2 <sub>1</sub> 2 <sub>1</sub> 2 <sub>1</sub> | R <sub>cryst</sub> /R <sub>free</sub> (%) | 24.0/28.8 |
| Resolution (Å)            | 74.42 - 2.05                                  | Number of reflections                     | 14329     |
| Cell dimensions           |                                               | RMSD bond length (Å)                      | 0.006     |
| a, b, c (Å)               | 53.8 69.4 74.4                                | RMSD bond angles (°)                      | 1.419     |
| α, β, γ (°)               | 90 90 90                                      | Number of atoms                           | 2400      |
| R <sub>meas</sub> (%)     | 14 (100)                                      | Average B-factor (Å <sup>2</sup> )        | 34.15     |
| CC <sub>1/2</sub> (%)     | 99.3 (83.9)                                   | Ramachandran plot                         |           |
| I/σ(I)                    | 6.8 (2.3)                                     | Preferred region                          | 273 (96%) |
| Completeness (%)          | 87.1 (75.1)                                   | Allowed region                            | 10 (4%)   |
| Multiplicity              | 6.4 (6.4)                                     | Outliers                                  | 0         |
| Mosaicity (°)             | 2.12                                          |                                           |           |
| Total observations        | 99515                                         |                                           |           |
| Total unique observations | 15604                                         |                                           |           |

Values in parentheses correspond to the highest-resolution shell

**Supplementary figure 1.** AeGe soaked crystal of CDK2. The experiment was performed starting with a gas stream humidity of 97% at a temperature of 17°C. A humidity gradient was applied down to 80% in 0.2% steps every 12 s. The aerosol solution contains 10 mM staurosporine dissolved in 100% DMSO and sprayed keeping the crystal volume constant. Only one crystal was needed to finish the experiment and accomplish complex formation **(A)** Human CDK2 monomer complexed with staurosporine. Positive electron density is displayed around the ligand atoms (Fo-Fc - 3σ). **(B)** Zoomed view of staurosporine and its electron density (omit map) in orthogonal view. **(C)** Crystallographic table summarizing data collection parameters and refinement. PDB ID: 7NVQ
